# Supplementary material for: In Silico Selection and Evaluation of Pugnins with Antibacterial and Anticancer Activity Using Skin Transcriptome of Treefrog (Boana pugnax)
Source: MDPI journal article supplement (doi:10.3390/pharmaceutics13040578), 2021-04-18
Supplement: s1 [file s1]

# Supplementary Materials: In Silico Selection and Evaluation of Pugnins with Antibacterial and Anticancer Activity Using Skin Transcriptome of Treefrog (*Boana pugnax*)

Yamil Liscano, Laura Medina, Jose Oñate-Garzón, Fanny Gúzman, Monica Pickholz and Jean Paul Delgado

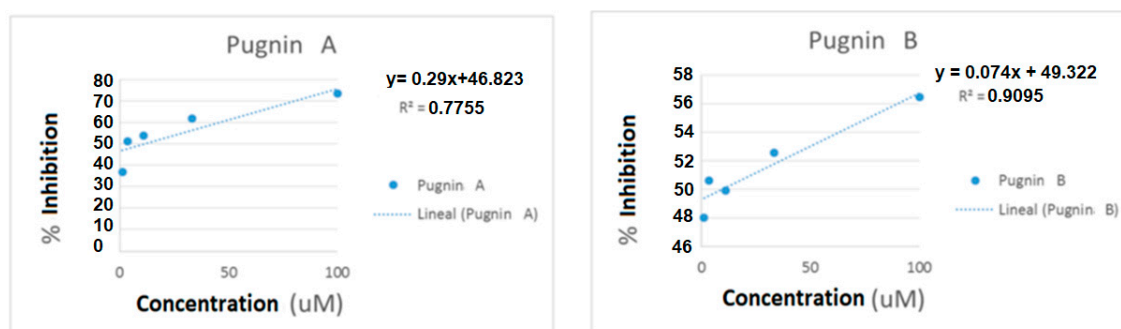

**Figure S1.** Percentage of growth inhibition of *S. aureus* of the pugnins A and B, with their respective  $R^2$  of the concentration curve of each peptide and the equation of the line is also observed.

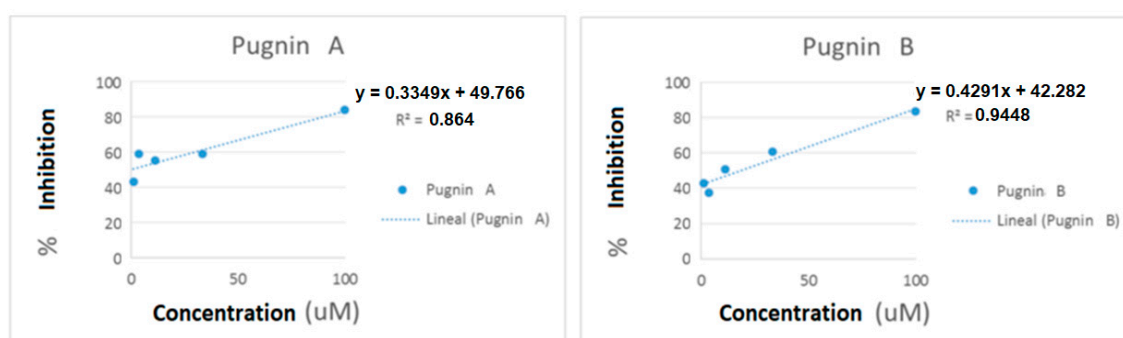

**Figure S2.** Percentage of growth inhibition of *E. faecalis* of the pugnins A and B, with their respective  $R^2$  of the concentration curve of each peptide and the equation of the line is also observed.

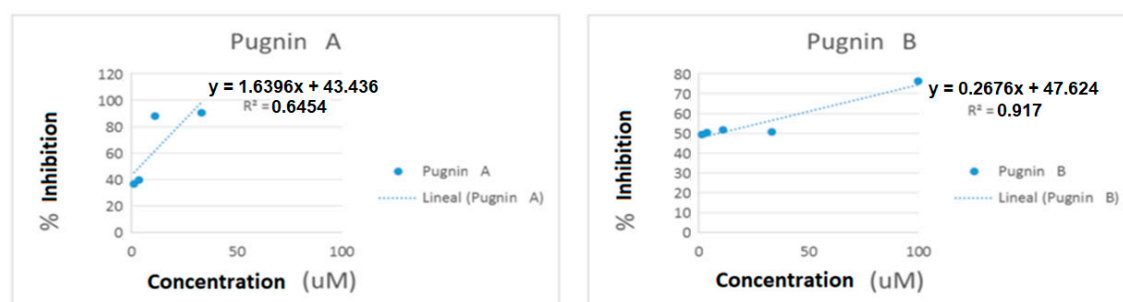

**Figure S3.** Percentage of growth inhibition of *P. aeruginosa* of the pugnins A and B, with their respective  $R^2$  of the concentration curve of each peptide and the equation of the line is also observed.

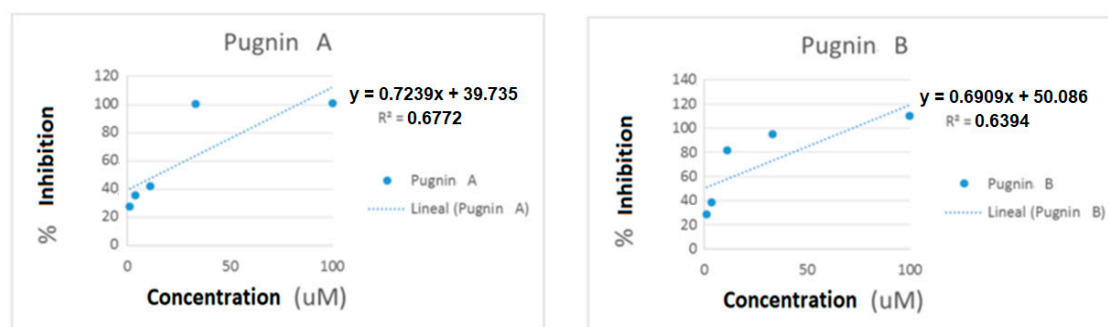

**Figure S4.** Percentage of growth inhibition of *E. coli* of the puginins A and B, with their respective  $R^2$  of the concentration curve of each peptide and the equation of the line is also observed.

#### ##### Extended Information

[Comments]  
Sample name 3665 TFE 30%  
Comment  
User  
Division  
Company NBC PUCV

#### [Detailed Information]

Creation date #####  
Data array type Linear data array \* 3  
Horizontal axis Wavelength [nm]  
Vertical axis(1) Mol. Ellip.  
Vertical axis(2) HT [V]  
Vertical axis(3) Abs  
Start 250 nm  
End 190 nm  
Data interval 0.5 nm  
Data points 121

#### [Measurement Information]

Instrument name DICROISMO PUCV  
Model name J-815  
Serial No. B052661168  
Accessory CDF-426S  
Accessory S/N B009861183  
Temperature 19.98 C  
Control sensor Holder  
Monitor sensor Holder  
Start Mode Start immediately  
Cell length 10 mm

Measurement date #####

Photometric mode CD. HT. Abs  
Measure range 250 - 190 nm  
Data pitch 0.5 nm  
Sensitivity Standard  
D.I.T. 2 sec  
Bandwidth 1.00 nm  
Start mode Immediately  
Scanning speed 100 nm/min  
Baseline correction None  
Shutter control Manual  
CD detector PMT  
PMT voltage Auto  
Accumulations

121

3

#### 3665 Puginin A TFE30%

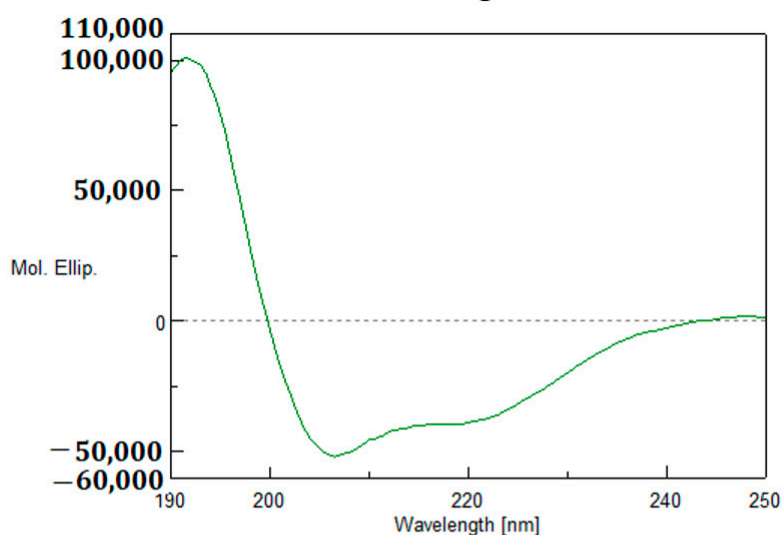

|               | 3665 TFE 30% | 3665 Agua | 3666 TFE 30% | 3666 Agua |
|---------------|--------------|-----------|--------------|-----------|
| Alfa          | 0.905        | 0.153     | 0.751        | 0.157     |
| Beta          | 0.000        | 0.000     | 0.001        | 0.000     |
| Turn          | 0.015        | 0.185     | 0.068        | 0.130     |
| PP2           | 0.001        | 0.000     | 0.028        | 0.057     |
| Unrd          | 0.079        | 0.662     | 0.152        | 0.656     |
| RMSD          | 0.525        | 0.472     | 0.281        | 0.968     |
| NRMSD         | 0.038        | 0.025     | 0.028        | 0.067     |
| Base de datos | SP37A        |           |              |           |
| Algoritmo     | Contin       |           |              |           |

**Figure S5.** Circular dichroism of puginin A.

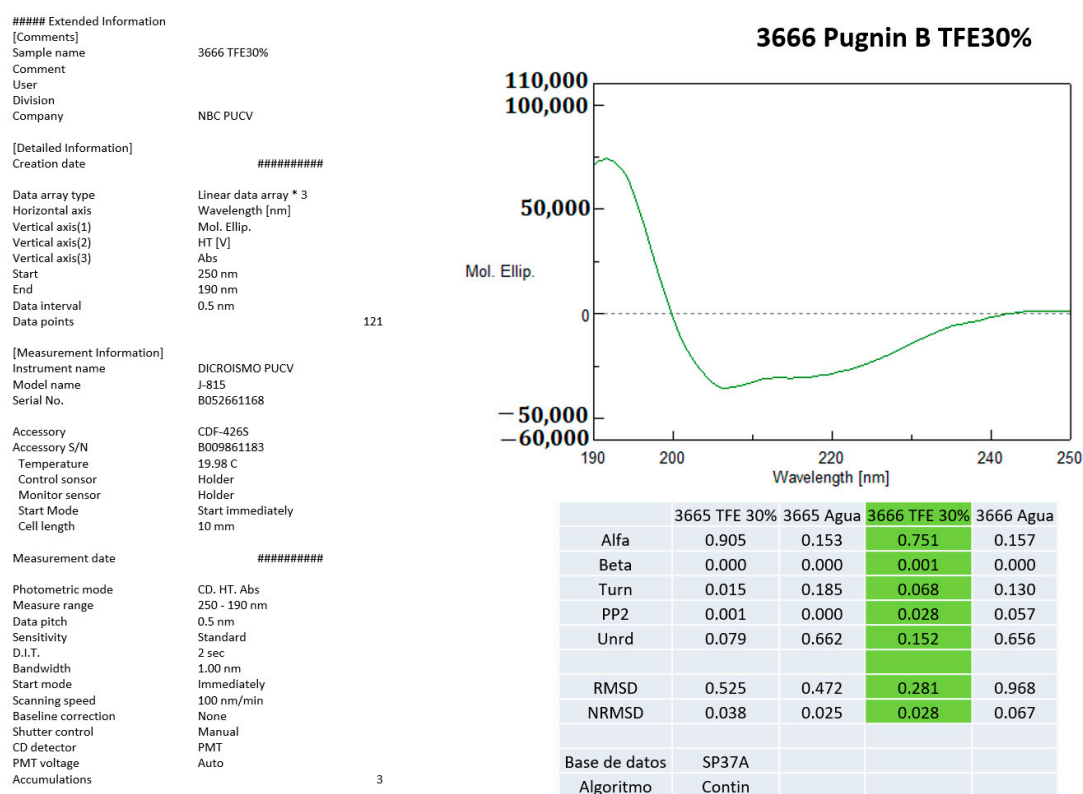

Figure S6. Circular dichroism of pugin B.

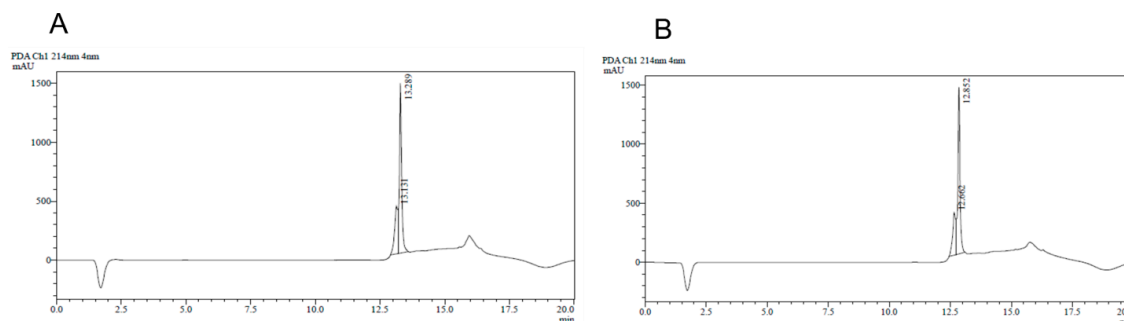

Figure S7. Chromatograms of puginins. (A) Pugin A. (B) Pugin B.

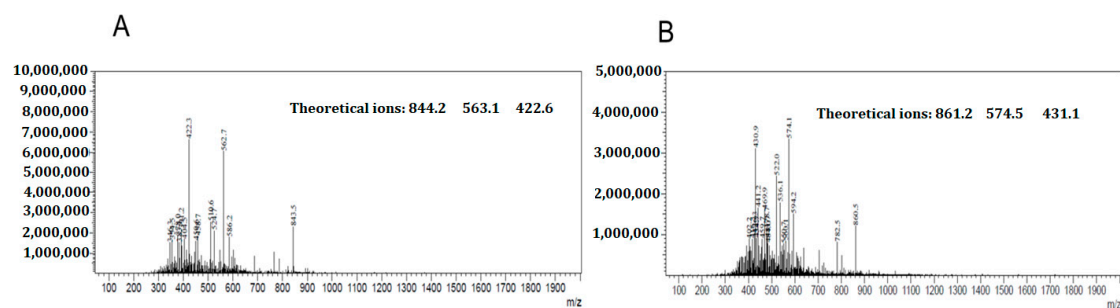

Figure S8. Mass spectrometry of puginins. (A) Pugin A. (B) Pugin B.

**Table S1.** Two-way ANOVA of antibacterial activity of pugnins on *E.coli*. \* significant value; \*\* high significant value; \*\*\*\* very high significant value.

| Table Analyzed           | Data 1               | P-Value  | P Value Summary | Significant?           | P-Value      |
|--------------------------|----------------------|----------|-----------------|------------------------|--------------|
| Two-way ANOVA<br>Alpha   | Ordinary<br>0,05     |          |                 |                        |              |
| Source of Variation      | % of total variation | P value  | P value summary | Significant?           |              |
| Interaction              | 10,22                | < 0,0001 | ****            | Yes                    |              |
| Row Factor               | 81,01                | < 0,0001 | ****            | Yes                    |              |
| Column Factor            | 8,772                | < 0,0001 | ****            | Yes                    |              |
| ANOVA table              | SS                   | DF       | MS              | F (DFn, DFd)           | P value      |
| Interaction              | 3905                 | 8        | 488,2           | F (8, 30) = 255137     | $P < 0,0001$ |
| Row Factor               | 30948                | 4        | 7737            | F (4, 30) = 4,044e+006 | $P < 0,0001$ |
| Column Factor            | 3351                 | 2        | 1676            | F (2, 30) = 875722     | $P < 0,0001$ |
| Residual                 | 0,0574               | 30       | 0,001913        |                        |              |
| Number of missing values | 0                    |          |                 |                        |              |

**Table S2.** Two-way ANOVA of antibacterial activity of pugnins on *P. aeruginosa*. \* significant value; \*\* high significant value; \*\*\*\* very high significant value.

| Table Analyzed           | Data 1               | P-Value  | P Value Summary | Significant?       | P-Value      |
|--------------------------|----------------------|----------|-----------------|--------------------|--------------|
| Two-way ANOVA<br>Alpha   | Ordinary<br>0,05     |          |                 |                    |              |
| Source of Variation      | % of total variation | P value  | P value summary | Significant?       |              |
| Interaction              | 30,27                | < 0,0001 | ****            | Yes                |              |
| Row Factor               | 61,02                | < 0,0001 | ****            | Yes                |              |
| Column Factor            | 8,710                | < 0,0001 | ****            | Yes                |              |
| ANOVA table              | SS                   | DF       | MS              | F (DFn, DFd)       | P value      |
| Interaction              | 5169                 | 8        | 646,1           | F (8, 30) = 136695 | $P < 0,0001$ |
| Row Factor               | 10419                | 4        | 2605            | F (4, 30) = 551067 | $P < 0,0001$ |
| Column Factor            | 1487                 | 2        | 743,6           | F (2, 30) = 157320 | $P < 0,0001$ |
| Residual                 | 0,1418               | 30       | 0,004727        |                    |              |
| Number of missing values | 0                    |          |                 |                    |              |

**Table S3.** Two-way ANOVA of antibacterial activity of pugnins on *E. faecalis*. \* significant value; \*\* high significant value; \*\*\*\* very high significant value.

| Table Analyzed           | Data 1               | P-Value  | P Value Summary | Significant?       | P-Value    |
|--------------------------|----------------------|----------|-----------------|--------------------|------------|
| Two-way ANOVA<br>Alpha   | Ordinary<br>0,05     |          |                 |                    |            |
| Source of Variation      | % of total variation | P value  | P value summary | Significant?       |            |
| Interaction              | 12,46                | < 0,0001 | ****            | Yes                |            |
| Row Factor               | 71,67                | < 0,0001 | ****            | Yes                |            |
| Column Factor            | 15,87                | < 0,0001 | ****            | Yes                |            |
| ANOVA table              | SS                   | DF       | MS              | F (DFn, DFd)       | P value    |
| Interaction              | 1045                 | 8        | 130,6           | F (8, 30) = 34361  | P < 0,0001 |
| Row Factor               | 6007                 | 4        | 1502            | F (4, 30) = 395190 | P < 0,0001 |
| Column Factor            | 1330                 | 2        | 664,9           | F (2, 30) = 174971 | P < 0,0001 |
| Residual                 | 0,1140               | 30       | 0,0038          |                    |            |
| Number of missing values | 0                    |          |                 |                    |            |

**Table S4.** Two-way ANOVA of antibacterial activity of pugnins on *S. aureus*. \* significant value; \*\* high significant value; \*\*\*\* very high significant value.

| Table Analyzed           | Data 1               | P-value  | P Value Summary | Significant?       | P-Value    |
|--------------------------|----------------------|----------|-----------------|--------------------|------------|
| Two-way ANOVA<br>Alpha   | Ordinary<br>0,05     |          |                 |                    |            |
| Source of Variation      | % of total variation | P value  | P value summary | Significant?       |            |
| Interaction              | 24,22                | < 0,0001 | ****            | Yes                |            |
| Row Factor               | 18,57                | < 0,0001 | ****            | Yes                |            |
| Column Factor            | 57,21                | < 0,0001 | ****            | Yes                |            |
| ANOVA table              | SS                   | DF       | MS              | F (DFn, DFd)       | P value    |
| Interaction              | 1389                 | 8        | 173,7           | F (8, 30) = 35492  | P < 0,0001 |
| Row Factor               | 1065                 | 4        | 266,3           | F (4, 30) = 54431  | P < 0,0001 |
| Column Factor            | 3282                 | 2        | 1641            | F (2, 30) = 335401 | P < 0,0001 |
| Residual                 | 0,1468               | 30       | 0,004893        |                    |            |
| Number of missing values | 0                    |          |                 |                    |            |

**Table S5.** Two-way ANOVA of Hemolytic activity of pugnins. \* significant value; \*\* high significant value; \*\*\*\* very high significant value.

| Table Analyzed           | Data 1               | P-Value  | P Value Summary | Significant?      | P-Value    |
|--------------------------|----------------------|----------|-----------------|-------------------|------------|
| Two-way ANOVA<br>Alpha   | Ordinary<br>0,05     |          |                 |                   |            |
| Source of Variation      | % of total variation | P value  | P value summary | Significant?      |            |
| Interaction              | 17,86                | < 0,0001 | ****            | Yes               |            |
| Row Factor               | 56,70                | < 0,0001 | ****            | Yes               |            |
| Column Factor            | 25,43                | < 0,0001 | ****            | Yes               |            |
| ANOVA table              | SS                   | DF       | MS              | F (DFn, DFd)      | P value    |
| Interaction              | 7586                 | 8        | 948,2           | F (8, 30) = 5985  | P < 0,0001 |
| Row Factor               | 24074                | 4        | 6019            | F (4, 30) = 37991 | P < 0,0001 |
| Column Factor            | 10797                | 2        | 5398            | F (2, 30) = 34077 | P < 0,0001 |
| Residual                 | 4,753                | 30       | 0,1584          |                   |            |
| Number of missing values | 0                    |          |                 |                   |            |

**Table S6.** One-way ANOVA and post-HOC comparisons of control with MTT cytotoxicity treatments of pugnins in HACAT cells. \* significant value; \*\* high significant value; \*\*\*\* very high significant value.

| Table Analyzed                                                        |            |                 | One-Way ANOVA Data |         |
|-----------------------------------------------------------------------|------------|-----------------|--------------------|---------|
| ANOVA Summary                                                         |            |                 |                    |         |
| F                                                                     |            |                 | 47,68              |         |
| P value                                                               |            |                 | <0,0001            |         |
| P value summary                                                       |            |                 | ****               |         |
| Are differences among means statistically significant? ( $P < 0.05$ ) |            |                 | Yes                |         |
| R square                                                              |            |                 | 0,7607             |         |
| Dunnett's multiple comparisons test                                   | Mean Diff, | 95% CI of diff, | Significant?       | Summary |
| Control vs. Pugnina A                                                 | 26,45      | 9,234 to 43,67  | Yes                | **      |
| Control vs. Pugnina B                                                 | 72,45      | 55,23 to 89,67  | Yes                | ****    |

**Table 7.** One-way ANOVA and post-HOC comparisons of control with MTT cytotoxicity treatments of pugnins in MFC7 cells. \* significant value; \*\* high significant value; \*\*\*\* very high significant value.

| Table Analyzed                                                        |            |                 | One-Way ANOVA Data |         |
|-----------------------------------------------------------------------|------------|-----------------|--------------------|---------|
| ANOVA Summary                                                         |            |                 |                    |         |
| F                                                                     |            |                 | 321,5              |         |
| P value                                                               |            |                 | <0,0001            |         |
| P value summary                                                       |            |                 | ****               |         |
| Are differences among means statistically significant? ( $P < 0.05$ ) |            |                 | Yes                |         |
| R square                                                              |            |                 | 0,9554             |         |
| Dunnett's multiple comparisons test                                   | Mean Diff, | 95% CI of diff, | Significant?       | Summary |
| Control vs. Pugnina A                                                 | 77,84      | 68,84 to 86,83  | Yes                | ****    |
| Control vs. Pugnina B                                                 | 84,88      | 75,88 to 93,88  | Yes                | ****    |

**Table 8.** One-way ANOVA and post-HOC comparisons of control with MTT cytotoxicity treatments of pugnins in PC3 cells. \* significant value; \*\* high significant value; \*\*\*\* very high significant value.

| Table Analyzed                                                        |            |                  | One-Way ANOVA Data |         |
|-----------------------------------------------------------------------|------------|------------------|--------------------|---------|
| ANOVA Summary                                                         |            |                  |                    |         |
| F                                                                     |            |                  | 3,445              |         |
| P value                                                               |            |                  | 0,0450             |         |
| P value summary                                                       |            |                  | *                  |         |
| Are differences among means statistically significant? ( $P < 0.05$ ) |            |                  | Yes                |         |
| R square                                                              |            |                  | 0,1868             |         |
| Dunnett's multiple comparisons test                                   | Mean Diff, | 95% CI of diff,  | Significant?       | Summary |
| Control vs. Pugnina A                                                 | 13,69      | 0,08111 to 27,31 | Yes                | *       |
| Control vs. Pugnina B                                                 | −1,387     | −15,00 to 12,23  | No                 | ns      |
